# Supplementary material for: Self-assembly of a surface bisphenol A-imprinted core–shell nanoring amino-functionalized superparamagnetic polymer
Source: Royal Society of Chemistry journal article supplement (doi:10.1039/c3ta12488f), 2013-01-01
Supplement: c3ta12488f.pdf [file c3ta12488f.pdf]

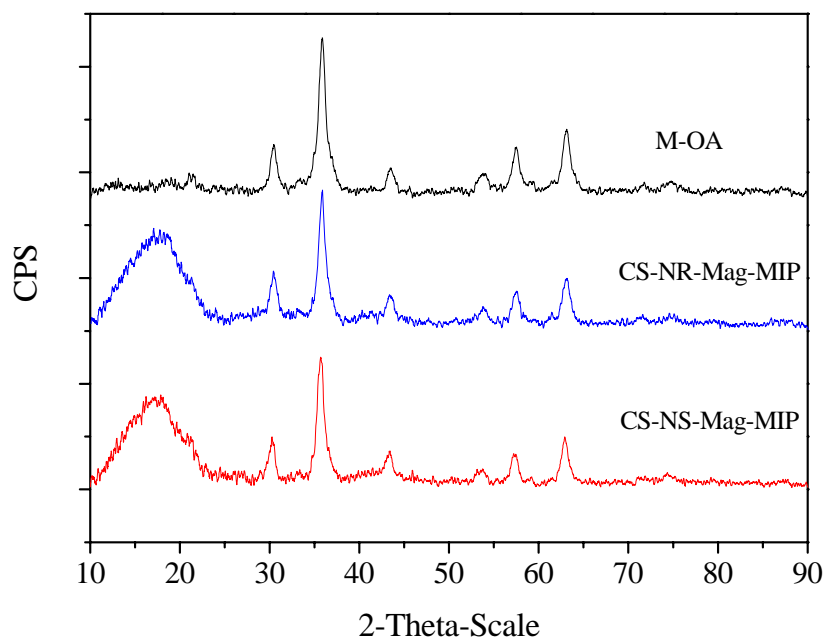

**Fig. S1.**† XRD patterns of M-OA nanoparticles, CS-NR-Mag-MIP nanoparticles prepared by ultrasound, and CS-NS-Mag-MIP nanoparticles prepared by CMA.

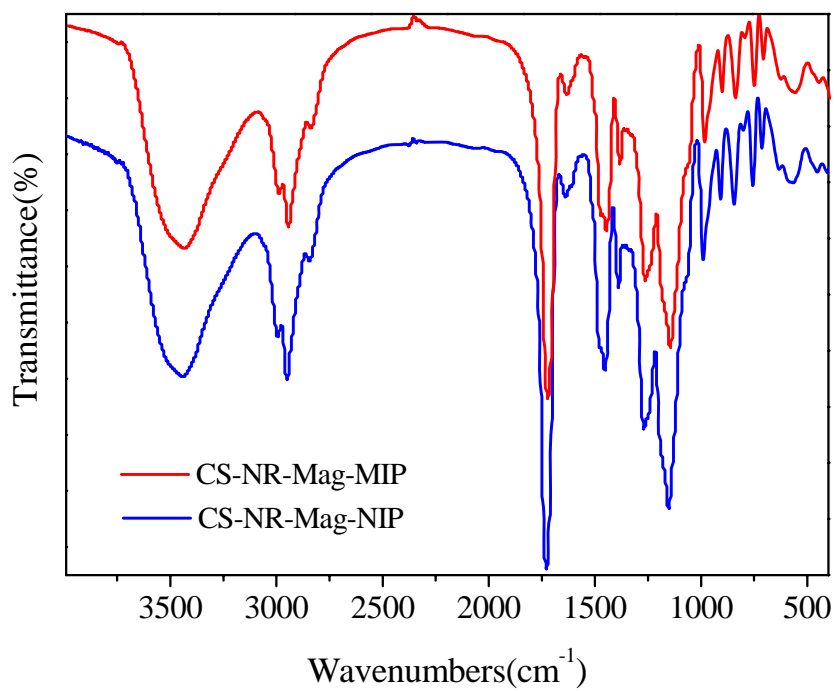

**Fig. S2.**† FTIR spectra of CS-NR-Mag-MIP and CS-NR-Mag-NIP nanoparticles prepared by ultrasound.
